# Supplementary material for: Construction of SHP-GLOX Straw Lignin Degulation System and Its Application Effect in Rice
Source: Research Square preprint supplement (doi:10.21203/rs.3.rs-1546069/v1), 2022-04-18
Supplement: Supplementary file 1 [file a8ce991854a657d6a11863d0.xlsx]

## Sheet: Table1
Name	Sequence of Primer5’→3’	TM（℃）
SHP - F	AGCTTCTGTTCTGGGAGGAGGTC	61.1
SHP - R	AGGTTGAAGAAAGGTGCTGGAAGG	59.6
GLOX - F	CGACCCGCCGTTCATGTTCAG	62
GLOX - R	GACTTGGACCTTGCTCGCCTTC	61.3
18s rRNA - F	CTACGTCCCTGCCCTTTGTACA	59.5
18s rRNA - R	ACACTTCACCGGACCATTCAA	55.6

## Sheet: Table 2
Strain	Plant height（cm）	Panicle length（cm）	Tiller number	Total panicle grains	Panicle grains	Seed setting rate（%）	Thousand - grain weight（g）
K1	73.4 ± 1.0e	12.9 ± 0.5a	12.6 ± 0.7def	163.67 ± 5.03fg	145.33 ± 4.04ghi	88.81 ± 1.10c	29.37 ± 0.74cde
K2	66.4 ± 1.5j	10.9 ± 0.8abc	15.9 ± 0.8a	182.33 ± 5.13ab	163.33 ± 3.51bcd	89.60 ± 1.72c	30.72 ± 0.43ab
K3	65.6 ± 0.5j	10.7 ± 0.7de	15.6 ± 0.7a	187.67 ± 2.52a	174.00 ± 2.65a	92.74 ± 2.42a	31.30 ± 0.56a
K4	77.4 ± 1.2d	12.6 ± 0.7e	12.2 ± 0.4defg	169.67 ± 4.04cdef	155.33 ± 3.21def	91.56 ± 0.54abc	29.50 ± 0.72cde
K5	68.6 ± 1.3i	11.9 ± 1.3abcd	14.1 ± 0.7bc	168.33 ± 6.11def	151.00 ± 3.46efg	89.73 ± 1.49bc	29.53 ± 0.74cde
K6	77.0 ± 1.2d	11.3 ± 0.5bcde	12.1 ± 1.5defg	182.33 ± 3.51ab	167.00 ± 5.29ab	91.58 ± 1.49abc	30.87 ± 0.35ab
K7	78.4 ± 1.4cd	12.6 ± 0.7cde	8.1 ± 0.9i	164.00 ± 4.36fg	148.67 ± 5.13fgh	90.64 ± 0.87abc	29.03 ± 0.35def
K8	68.8 ± 0.5hi	12.4 ± 1.3abcd	13.5 ± 0.3cd	161.00 ± 7.21fg	146.67 ± 6.66fghi	91.10 ± 0.83abc	28.67 ± 0.78def
K9	85.6 ± 0.6a	13.5 ± 0.8ab	8.1 ± 0.9i	180.33 ± 3.06ab	165.33 ± 4.73bc	91.67 ± 1.53abc	30.80 ± 0.70ab
K10	78.2 ± 1.1d	12.5 ± 0.9abcde	11.4 ± 0.9efg	178.33 ± 2.08bc	162.67 ± 5.51bcd	91.20 ± 2.07abc	30.30 ± 0.70abc
K11	70.7 ± 1.5f	11.4 ± 1.0cde	12.5 ± 0.3def	177.00 ± 4.58bcd	157.33 ± 3.79cde	88.89 ± 0.47c	29.23 ± 0.31cde
K12	72.7 ± 0.6ef	13.7 ± 0.8a	11.2 ± 0.9fg	183.00 ± 4.00ab	163.33 ± 1.53bcd	89.27 ± 1.55c	30.80 ± 0.82ab
K13	68.2 ± 1.3i	11.2 ± 0.8cde	14.2 ± 0.4bc	155.67 ± 6.03g	140.00 ± 4.58i	89.95 ± 0.63abc	28.73 ± 0.78def
K14	77.6 ± 0.7d	13.0 ± 0.5abc	11.6 ± 0.8efg	156.33 ± 4.73g	140.67 ± 6.03hi	89.96 ± 1.79abc	28.83 ± 0.23def
K15	80.2 ± 1.0c	12.7 ± 0.8abc	10.8 ± 0.4g	176.67 ± 2.52bcd	161.67 ± 1.53bcd	91.53 ± 1.92abc	29.30 ± 0.60cde
K16	77.2 ± 1.5d	12.5 ± 0.9abcde	12.6 ± 1.4de	167.33 ± 6.03ef	150.67 ± 3.06efg	90.08 ± 1.61abc	28.80 ± 0.61def
K17	72.3 ± 1.3efg	11.6 ± 1.2cde	12.2 ± 0.4defg	155.67 ± 6.11g	142.00 ± 6.56hi	91.20 ± 0.67abc	28.00 ± 0.46e
K18	82.5 ± 1.0b	12.5 ± 0.9abcd	8.4 ± 0.7hi	175.67 ± 6.81bcde	162.33 ± 3.06bcd	92.46 ± 1.90ab	29.80 ± 0.66bcd
K19	71.5 ± 0.7fg	11.7 ± 0.9cde	12.8 ± 0.9de	157.00 ± 6.56g	141.67 ± 8.02hi	90.20 ± 1.58abc	28.37 ± 0.50ef
K20	78.5 ± 0.9cd	11.5 ± 1.5cde	9.5 ± 0.4h	174.33 ± 6.66bcde	157.00 ± 5.57cdef	90.07 ± 1.26abc	29.37 ± 0.70cde
WT	70.4 ± 3.3gh	14.1 ± 1.2a	15.3 ± 2.6ab	167.20 ± 10.63ef	151.9 ± 9.85efg	90.85 ± 1.53abc	29.53 ± 0.75cde

## Sheet: Table 3
Name	Plant height（cm）	Panicle length（cm）	Tiller number	Total panicle grains	Panicle grains	Seed setting rate（%）	Thousand - grain weight（g）
WT1	68.2	12.5	23	178	165	92.7	30.16
WT2	80.2	16.3	12	150	137	91.33	28.48
WT3	73.1	13.8	18	162	148	91.36	29.28
WT4	71.4	12.7	19	168	154	91.67	29.74
WT5	72.5	13.5	20	169	150	88.76	29.4
WT6	68	15.8	21	159	145	91.19	28.9
WT7	67.5	12.3	23	160	145	90.63	28.93
WT8	72.2	15.9	19	192	170	88.54	31.2
WT9	69.3	12.8	21	155	143	92.26	28.55
WT10	71.5	15.3	20	169	153	90.53	29.4
WT11	68	15.1	21	175	161	92	30.2
WT12	68.3	14.3	22	169	151	89.35	29.7
WT13	69.5	14.7	21	179	161	89.94	30.5
WT14	69.8	14.9	20	154	141	91.56	28.3
WT15	73.6	13	18	160	142	88.75	29.5
WT16	74.5	14.1	19	183	170	92.9	30.3
WT17	67.9	12.9	23	164	153	93.29	29.1
WT18	68.1	14.5	21	161	145	90.06	29.9
WT19	66.1	13.8	24	175	161	92	30.1
WT20	68.9	13.6	21	162	143	88.27	28.94
error	3.3	1.2	2.6	10.63	9.85	1.53	0.75
average value	70.4	14.1	20.3	167.2	151.9	90.85	29.53
